# Supplementary material for: Comparative Phylogeography of Phoxinus, Delminichthys, Phoxinellus and Telestes in Dinaric Karst: Which Factors Have Influenced Their Current Distributions?
Source: MDPI journal article supplement (doi:10.3390/d14070526), 2022-06-29
Supplement: s1 [file s1]

# Comparative phylogeography of *Phoxinus*, *Delminichthys*, *Phoxinellus*, and *Telestes* in the Dinaric karst: what factors influenced the current pattern of their distribution?

Susanne Reier<sup>1,2</sup>, Nina Bogutskaya<sup>1</sup>, Anja Palandačić<sup>1,3</sup>

<sup>1</sup> First Zoological Department, Vienna Museum of Natural History, Burgring 7, 1010 Vienna, Austria

<sup>2</sup> Department of Evolutionary Biology, University of Vienna, Djerassiplatz 1, 1030 Vienna, Austria

<sup>3</sup> University of Ljubljana, Biotechnical Faculty, Department of Biology, Jamnikarjeva 101, SI-1000 Ljubljana, Slovenia

## Supplementary material

### List of tables

Table S1. Mitochondrial lineages of *Phoxinus* used for the various types of analysis.

| Mt (sub-)lineage/species | Distributed in Dinaric karst | Haplotype network | Diversity indices | p-distances | Divergence time dating | Ancestral biogeography |
|--------------------------|------------------------------|-------------------|-------------------|-------------|------------------------|------------------------|
| 1a – <i>P. lumiareul</i> | x                            | x                 | x                 | x           | x                      | x                      |
| 1b – <i>P. lumiareul</i> | x                            | x                 | x                 | x           | x                      | x                      |
| 1c – <i>P. lumiareul</i> | x                            | x                 | x                 | x           | x                      | x                      |
| 1d – <i>P. lumiareul</i> |                              | x                 |                   | x           | x                      | x                      |
| 1e – <i>P. lumiareul</i> | x                            | x                 | x                 | x           | x                      | x                      |
| 1f – <i>P. lumiareul</i> |                              | x                 |                   | x           | x                      | x                      |
| 2                        | x                            | x                 | x                 | x           | x                      | x                      |
| 3                        | x                            | x                 | x                 | x           | x                      | x                      |
| 4                        | x                            | x                 | x                 | x           | x                      | x                      |
| 5a – <i>P. csikii</i>    | x                            | x                 | x                 | x           | x                      | x                      |
| 6 – <i>P. krkae</i>      | x                            | x                 | x                 | x           | x                      | x                      |
| 7 – <i>P. karsticus</i>  | x                            | x                 | x                 | x           | x                      | x                      |
| 8                        | x                            | x                 | x                 | x           | x                      | x                      |

**Table S2. Presented as a separate Excel file** with four sheets for each genus. Details for sampling localities and source of data are given. For samples colored in black genetic data are available, while those marked in red correspond to distribution data without genetic information, collected from the literature, personal observations and personal communications.

#### Add Material & Methods section 2.5

1. For the phylogenetic tree reconstruction for and divergence time dating, several preliminary analyses with different datasets/outgroups were conducted. The datasets/outgroups were chosen based on 36., 54. 55. and 79.. The datasets tested: *Phoxinus* from Balkan with only one haplotype per lineage (*Phoxinus phoxinus* from Mongolia as outgroup)
2. *Phoxinus* with one haplotype per lineage with all occurring lineages in Europe
3. *Phoxinellus* only (*Phoxinus* as outgroup)
4. *Telestes* only (*Phoxinus* as outgroup)
5. *Delminichthys* only (*Phoxinus* as outgroup)
6. *Phoxinellus* and *Telestes* (with their sistergroups *Chondrostoma* and *Pseudophoxinus*)
7. *Phoxinellus*, *Delminichthys* and *Telestes* (with their sistergroups (*Chondrostoma*, *Pseudophoxinus* and *Pelagus*), *Squalius cephalus*, *Rutilus rutilus*, *Alburnus alburnus*, *Leuciscus leuciscus*, *Vimba vimba*; outgroups: *Phoxinus*, *Cyprinus carpio* and *Carassius auratus*)

The two datasets described in the Material & methods section of the manuscript revealed the overall highest ESS values in the trace files, as well as the highest marginal likelihood values.

Table S3. All samples with GenBank accession numbers and references included in the divergence timing analysis of *Phoxinus* mt lineages.

| Species                   | Clade | GenBank   | Reference                |
|---------------------------|-------|-----------|--------------------------|
| <i>Alburnus alburnus</i>  |       | AB239593  | Saitoh et al. [2]        |
| <i>Cyprinus carpio</i>    |       | NC_001606 | Chang, Huang, and Lo [3] |
| <i>Phoxinus lumaireul</i> | 1a    | KT166665  | Palandačić et al. [4]    |
| <i>Phoxinus lumaireul</i> | 1a    | KT166757  | Palandačić et al. [4]    |
| <i>Phoxinus lumaireul</i> | 1a    | ON494605  | Reier et al. [5]         |
| <i>Phoxinus lumaireul</i> | 1a    | KT166668  | Palandačić et al. [4]    |
| <i>Phoxinus lumaireul</i> | 1a    | ON494698  | Reier et al. [5]         |
| <i>Phoxinus lumaireul</i> | 1a    | ON494839  | Reier et al. [5]         |
| <i>Phoxinus lumaireul</i> | 1a    | ON494712  | Reier et al. [5]         |
| <i>Phoxinus lumaireul</i> | 1a    | KT166604  | Palandačić et al. [4]    |
| <i>Phoxinus lumaireul</i> | 1a    | KT166722  | Palandačić et al. [4]    |
| <i>Phoxinus lumaireul</i> | 1a    | KT166647  | Palandačić et al. [4]    |
| <i>Phoxinus lumaireul</i> | 1a    | KT166734  | Palandačić et al. [4]    |
| <i>Phoxinus lumaireul</i> | 1a    | MG681503  | Vučić et al. [6]         |
| <i>Phoxinus lumaireul</i> | 1a    | KT166828  | Palandačić et al. [4]    |
| <i>Phoxinus lumaireul</i> | 1a    | KT166832  | Palandačić et al. [4]    |
| <i>Phoxinus lumaireul</i> | 1a    | ON494890  | Reier et al. [5]         |
| <i>Phoxinus lumaireul</i> | 1b    | ON494754  | Reier et al. [5]         |
| <i>Phoxinus lumaireul</i> | 1b    | ON494856  | Reier et al. [5]         |

|                           |    |          |                       |
|---------------------------|----|----------|-----------------------|
| <i>Phoxinus lumaireul</i> | 1b | KT166653 | Palandačić et al. [4] |
| <i>Phoxinus lumaireul</i> | 1b | KT166742 | Palandačić et al. [4] |
| <i>Phoxinus lumaireul</i> | 1b | KT166759 | Palandačić et al. [4] |
| <i>Phoxinus lumaireul</i> | 1b | KT166743 | Palandačić et al. [4] |
| <i>Phoxinus lumaireul</i> | 1b | KT166784 | Palandačić et al. [4] |
| <i>Phoxinus lumaireul</i> | 1b | KT166785 | Palandačić et al. [4] |
| <i>Phoxinus lumaireul</i> | 1b | KT166729 | Palandačić et al. [4] |
| <i>Phoxinus lumaireul</i> | 1b | KT166631 | Palandačić et al. [4] |
| <i>Phoxinus lumaireul</i> | 1b | MG681431 | Vučić et al. [6]      |
| <i>Phoxinus lumaireul</i> | 1b | MG681432 | Vučić et al. [6]      |
| <i>Phoxinus lumaireul</i> | 1b | KT166824 | Palandačić et al. [4] |
| <i>Phoxinus lumaireul</i> | 1b | KT166829 | Palandačić et al. [4] |
| <i>Phoxinus lumaireul</i> | 1c | ON494640 | Reier et al. [5]      |
| <i>Phoxinus lumaireul</i> | 1c | ON494611 | Reier et al. [5]      |
| <i>Phoxinus lumaireul</i> | 1c | KT166627 | Palandačić et al. [4] |
| <i>Phoxinus lumaireul</i> | 1c | ON495044 | Reier et al. [5]      |
| <i>Phoxinus lumaireul</i> | 1c | ON494783 | Reier et al. [5]      |
| <i>Phoxinus lumaireul</i> | 1c | ON494807 | Reier et al. [5]      |
| <i>Phoxinus lumaireul</i> | 1c | KT166716 | Palandačić et al. [4] |
| <i>Phoxinus lumaireul</i> | 1c | ON738222 | this study            |
| <i>Phoxinus lumaireul</i> | 1c | KT166588 | Palandačić et al. [4] |
| <i>Phoxinus lumaireul</i> | 1d | KT166725 | Palandačić et al. [4] |
| <i>Phoxinus lumaireul</i> | 1d | KT166708 | Palandačić et al. [4] |
| <i>Phoxinus lumaireul</i> | 1d | KT166584 | Palandačić et al. [4] |
| <i>Phoxinus lumaireul</i> | 1e | KT166790 | Palandačić et al. [4] |
| <i>Phoxinus lumaireul</i> | 1f | KT166762 | Palandačić et al. [4] |
| <i>Phoxinus lumaireul</i> | 1f | KT166769 | Palandačić et al. [4] |
| <i>Phoxinus csikii</i>    | 5a | KT166638 | Palandačić et al. [4] |
| <i>Phoxinus csikii</i>    | 5a | KT166753 | Palandačić et al. [4] |
| <i>Phoxinus csikii</i>    | 5a | KT166553 | Palandačić et al. [4] |
| <i>Phoxinus sp.</i>       | 2  | KT166780 | Palandačić et al. [4] |
| <i>Phoxinus sp.</i>       | 2  | KT166557 | Palandačić et al. [4] |
| <i>Phoxinus sp.</i>       | 2  | KT166558 | Palandačić et al. [4] |
| <i>Phoxinus sp.</i>       | 2  | KT166813 | Palandačić et al. [4] |
| <i>Phoxinus sp.</i>       | 2  | KT166589 | Palandačić et al. [4] |
| <i>Phoxinus sp.</i>       | 2  | KT166620 | Palandačić et al. [4] |
| <i>Phoxinus sp.</i>       | 2  | KT166645 | Palandačić et al. [4] |
| <i>Phoxinus sp.</i>       | 3  | KT166691 | Palandačić et al. [4] |
| <i>Phoxinus sp.</i>       | 3  | KT166692 | Palandačić et al. [4] |
| <i>Phoxinus sp.</i>       | 3  | KT166693 | Palandačić et al. [4] |
| <i>Phoxinus sp.</i>       | 4  | KT166574 | Palandačić et al. [4] |
| <i>Phoxinus sp.</i>       | 4  | KT166575 | Palandačić et al. [4] |
| <i>Phoxinus csikii</i>    | 5a | KT166638 | Palandačić et al. [4] |
| <i>Phoxinus krkae</i>     | 6  | KT166546 | Palandačić et al. [4] |
| <i>Phoxinus krkae</i>     | 6  | KT166548 | Palandačić et al. [4] |
| <i>Phoxinus krkae</i>     | 6  | KT166551 | Palandačić et al. [4] |
| <i>Phoxinus karsticus</i> | 7  | KT166776 | Palandačić et al. [4] |

|                           |   |          |                       |
|---------------------------|---|----------|-----------------------|
| <i>Phoxinus karsticus</i> | 7 | KT166778 | Palandačić et al. [4] |
| <i>Phoxinus karsticus</i> | 7 | MG681299 | Vučić et al. [6]      |
| <i>Phoxinus karsticus</i> | 7 | MG681489 | Vučić et al. [6]      |
| <i>Phoxinus karsticus</i> | 7 | MG681490 | Vučić et al. [6]      |
| <i>Phoxinus karsticus</i> | 7 | KT166806 | Palandačić et al. [4] |
| <i>Phoxinus karsticus</i> | 7 | KT166820 | Palandačić et al. [4] |
| <i>Phoxinus karsticus</i> | 7 | KT166649 | Palandačić et al. [4] |
| <i>Phoxinus sp.</i>       | 7 | KT166815 | Palandačić et al. [4] |
| <i>Phoxinus sp.</i>       | 7 | KT166817 | Palandačić et al. [4] |
| <i>Phoxinus sp.</i>       | 8 | KT166678 | Palandačić et al. [4] |
| <i>Phoxinus sp.</i>       | 8 | KT166679 | Palandačić et al. [4] |
| <i>Phoxinus sp.</i>       | 8 | KT166683 | Palandačić et al. [4] |
| <i>Rutilus rutilus</i>    |   | AP010775 | Saitoh et al. [2]     |
| <i>Squalius cephalus</i>  |   | NC031540 | Iwasaki et al. [7]    |

Table S4. All samples with GenBank accession numbers and references included in the divergence timing analysis of *Delminichthys*, *Phoxinellus* and *Telestes* and sister/outgroups.

| Species                             | GenBank   | Reference                     |
|-------------------------------------|-----------|-------------------------------|
| <i>Barbus barbus</i>                | NC_008654 | Saitoh et al. [8]             |
| <i>Carassius auratus</i>            | KJ874430  | Cheng, Liang, and Sun [9]     |
| <i>Chondrostoma nasus</i>           | MG806657  | Schönhuth et al. [10]         |
| <i>Chondrostoma phoxinus</i>        | MG806658  | Schönhuth et al. [10]         |
| <i>Cyprinus carpio</i>              | NC_001606 | Chang, Huang, and Lo (1994)   |
| <i>Delminichthys adspersus</i>      | JQ315974  | Palandačić et al. [11]        |
| <i>Delminichthys ghetaldii</i>      | MG806663  | Schönhuth et al. [10]         |
| <i>Delminichthys jadovensis</i>     | ON738200  | this study                    |
| <i>Delminichthys krbavensis</i>     | ON738195  | this study                    |
| <i>Pachychilon macedonicum</i>      | MG806671  | Schönhuth et al. [10]         |
| <i>Pelasgus minutus</i>             | MZ230788  | Viñuela Rodríguez et al. [12] |
| <i>Pelecus cultratus</i>            | AY838938  | Freyhof et al. [13]           |
| <i>Phoxinellus alepidotus</i>       | ON738208  | this study                    |
| <i>Phoxinellus dalmaticus</i>       | ON738213  | this study                    |
| <i>Phoxinellus pseudoalepidotus</i> | ON738206  | this study                    |
| <i>Pseudophoxinus anatolicus</i>    | AY494754  | Hrbek et al. [14]             |
| <i>Rutilus rutilus</i>              | AP010775  | Saitoh et al. (2011)          |
| <i>Rutilus rutilus</i>              | MG806695  | Schönhuth et al. [10]         |
| <i>Squalius cephalus</i>            | MG806701  | Schönhuth et al. [10]         |
| <i>Squalius cephalus</i>            | NC031540  | Iwasaki et al. [7]            |
| <i>Telestes beoticus</i>            | MG372658  | Buj et al. [15]               |
| <i>Telestes croaticus</i>           | AY509828  | Ketmaier et al. [16]          |
| <i>Telestes dabar</i>               | MG372497  | Buj et al. [15]               |
| <i>Telestes fontinalis</i>          | MG372533  | Buj et al. [15]               |
| <i>Telestes karsticus</i>           | JN188371  | Marčić et al. [17]            |
| <i>Telestes metohiensis</i>         | MK482048  | Benovics et al. [18]          |

|                                   |            |                       |
|-----------------------------------|------------|-----------------------|
| <i>Telestes miloradi</i>          | MG372657   | Buj et al. [15]       |
| <i>Telestes muticellus</i>        | MG372593   | Buj et al. [15]       |
| <i>Telestes montenegrinus</i>     | AY509849   | Ketmaier et al. [16]  |
| <i>Telestes pleurobipunctatus</i> | MG372650   | Buj et al. [15]       |
| <i>Telestes polylepis</i>         | HM560222   | Perea et al. [19]     |
| <i>Telestes souffia</i>           | AY509861.1 | Ketmaier et al. [16]  |
| <i>Telestes souffia</i>           | MG372582   | Buj et al. [15]       |
| <i>Telestes turskyi</i>           | MG372555   | Buj et al. [15]       |
| <i>Telestes ukliva</i>            | MG372543   | Buj et al. [15]       |
| <i>Vimba melanops</i>             | MG806725   | Schönhuth et al. [10] |

**Table S5.** Genetic diversity parameters of the mitochondrial cytochrome b marker of the four fish genera. Abbreviations: *h*, number of haplotypes; *Hd*, haplotype diversity;  $\pi$ , nucleotide diversity; *S*, number of polymorphic sites; *k*, mean number of pairwise differences; *N*, number of sequences.

| ID                          | <i>h</i> | <i>Hd</i> | $\pi$  | <i>S</i> | <i>k</i> | <i>N</i> |
|-----------------------------|----------|-----------|--------|----------|----------|----------|
| <b><i>Phoxinus</i></b>      |          |           |        |          |          |          |
| all                         | 297      |           |        |          |          | 1,008    |
| 1                           | 225      | 0.95      | 0.0183 | 243      | 19.95    | 886      |
| 1a                          | 88       | 0.81      | 0.0072 | 149      | 7.81     | 393      |
| 1b                          | 84       | 0.96      | 0.0085 | 124      | 9.23     | 267      |
| 1c                          | 40       | 0.83      | 0.0077 | 81       | 8.43     | 186      |
| 1e                          | 9        | 0.94      | 0.0026 | 13       | 2.82     | 12       |
| 2                           | 22       | 0.91      | 0.0111 | 80       | 12.10    | 40       |
| 3                           | 4        | 1.00      | 0.0029 | 6        | 3.17     | 4        |
| 4                           | 2        | 0.67      | 0.0012 | 2        | 1.33     | 3        |
| 5a                          | 13       | 0.94      | 0.0074 | 31       | 8.10     | 21       |
| 6                           | 3        | 0.42      | 0.0006 | 3        | 0.67     | 9        |
| 7                           | 19       | 0.92      | 0.0032 | 26       | 3.53     | 41       |
| 8                           | 3        | 0.60      | 0.0006 | 2        | 0.67     | 6        |
| <b><i>Delminichthys</i></b> |          |           |        |          |          |          |
| all                         | 84       |           |        |          |          | 359      |
| <i>adspersus</i>            | 74       | 0.74      | 0.0012 | 78       | 1.23     | 340      |
| <i>ghetaldii</i>            | 3        | 0.70      | 0.0022 | 5        | 2.2      | 5        |
| <i>jadovens</i>             | 2        | 0.33      | 0.0003 | 1        | 0.33     | 6        |

|                           |    |      |        |    |       |     |
|---------------------------|----|------|--------|----|-------|-----|
| <i>krbavensis</i>         | 5  | 0.86 | 0.0032 | 9  | 3.18  | 8   |
| <b><i>Phoxinellus</i></b> |    |      |        |    |       |     |
| all                       | 16 |      |        |    |       | 17  |
| <i>alepidotus</i>         | 4  | 1.00 | 0.0024 | 5  | 2.67  | 4   |
| <i>dalmaticus</i>         | 6  | 0.95 | 0.0021 | 6  | 2.29  | 7   |
| <i>pseudoalepidotus</i>   | 6  | 1.00 | 0.0035 | 10 | 3.93  | 6   |
| <b><i>Telestes</i></b>    |    |      |        |    |       |     |
| all                       | 96 |      |        |    |       | 197 |
| <i>croaticus</i>          | 20 | 0.97 | 0.0147 | 75 | 15.30 | 25  |
| <i>dabar</i>              | 9  | 0.74 | 0.0023 | 11 | 2.40  | 55  |
| <i>fontinalis</i>         | 8  | 0.97 | 0.0042 | 16 | 4.39  | 9   |
| <i>karsticus</i>          | 9  | 0.95 | 0.0036 | 17 | 3.72  | 13  |
| <i>miloradi</i>           | 1  |      |        |    |       | 1   |
| <i>methionensis</i>       | 11 | 0.78 | 0.0072 | 85 | 7.49  | 26  |
| <i>montenegrinus</i>      | 15 | 0.86 | 0.0047 | 38 | 4.94  | 42  |
| <i>polylepis</i>          | 4  | 0.80 | 0.0017 | 4  | 1.80  | 6   |
| <i>turskyi</i>            | 6  | 0.95 | 0.0036 | 11 | 3.71  | 7   |
| <i>ukliva</i>             | 12 | 1.00 | 0.0057 | 26 | 5.97  | 12  |

Table S6. Pairwise uncorrected p-distances between species/lineages of each genera. Species names of *Delminichthys*, *Phoxinellus* and *Telestes* are abbreviated in the horizontal line.

| <b><i>Phoxinus</i></b>      | 1a         | 1b         | 1c         | 1e   | 5    | 2    | 3    | 4    | 6    | 7    |
|-----------------------------|------------|------------|------------|------|------|------|------|------|------|------|
| 1a                          |            |            |            |      |      |      |      |      |      |      |
| 1b                          | 0.02       |            |            |      |      |      |      |      |      |      |
| 1c                          | 0.02       | 0.02       |            |      |      |      |      |      |      |      |
| 1e                          | 0.03       | 0.03       | 0.03       |      |      |      |      |      |      |      |
| 5                           | 0.06       | 0.06       | 0.06       | 0.06 |      |      |      |      |      |      |
| 2                           | 0.04       | 0.05       | 0.04       | 0.05 | 0.05 |      |      |      |      |      |
| 3                           | 0.05       | 0.06       | 0.05       | 0.06 | 0.05 | 0.04 |      |      |      |      |
| 4                           | 0.05       | 0.06       | 0.05       | 0.06 | 0.05 | 0.04 | 0.05 |      |      |      |
| 6                           | 0.07       | 0.07       | 0.07       | 0.07 | 0.08 | 0.06 | 0.08 | 0.07 |      |      |
| 7                           | 0.08       | 0.09       | 0.08       | 0.08 | 0.09 | 0.07 | 0.08 | 0.08 | 0.08 |      |
| 8                           | 0.08       | 0.09       | 0.09       | 0.09 | 0.09 | 0.07 | 0.08 | 0.09 | 0.09 | 0.08 |
| <b><i>Delminichthys</i></b> | <i>ads</i> | <i>ghe</i> | <i>jad</i> |      |      |      |      |      |      |      |

|                           |            |            |            |            |            |            |            |            |            |  |
|---------------------------|------------|------------|------------|------------|------------|------------|------------|------------|------------|--|
| <i>adpersus</i>           |            |            |            |            |            |            |            |            |            |  |
| <i>ghetaldii</i>          | 0.02       |            |            |            |            |            |            |            |            |  |
| <i>jadovensis</i>         | 0.04       | 0.04       |            |            |            |            |            |            |            |  |
| <i>krbavensis</i>         | 0.04       | 0.04       | 0.02       |            |            |            |            |            |            |  |
| <b><i>Phoxinellus</i></b> | <i>ale</i> | <i>pse</i> | <i>dal</i> |            |            |            |            |            |            |  |
| <i>alepidotus</i>         |            |            |            |            |            |            |            |            |            |  |
| <i>pseudoalepidotus</i>   | 0.02       |            |            |            |            |            |            |            |            |  |
| <i>dalmaticus</i>         | 0.04       | 0.05       |            |            |            |            |            |            |            |  |
| <b><i>Telestes</i></b>    | <i>cro</i> | <i>dab</i> | <i>fon</i> | <i>kar</i> | <i>met</i> | <i>mil</i> | <i>mon</i> | <i>pol</i> | <i>tur</i> |  |
| <i>croaticus</i>          |            |            |            |            |            |            |            |            |            |  |
| <i>dabar</i>              | 0.11       |            |            |            |            |            |            |            |            |  |
| <i>fontinalis</i>         | 0.03       | 0.11       |            |            |            |            |            |            |            |  |
| <i>karsticus</i>          | 0.10       | 0.10       | 0.09       |            |            |            |            |            |            |  |
| <i>metohiensis</i>        | 0.11       | 0.01       | 0.11       | 0.09       |            |            |            |            |            |  |
| <i>miloradi</i>           | 0.11       | 0.03       | 0.11       | 0.10       | 0.03       |            |            |            |            |  |
| <i>montenegrinus</i>      | 0.09       | 0.10       | 0.10       | 0.07       | 0.10       | 0.10       |            |            |            |  |
| <i>polylepis</i>          | 0.09       | 0.09       | 0.08       | 0.04       | 0.09       | 0.09       | 0.07       |            |            |  |
| <i>turskyi</i>            | 0.10       | 0.10       | 0.10       | 0.07       | 0.10       | 0.10       | 0.08       | 0.07       |            |  |
| <i>ukliva</i>             | 0.10       | 0.08       | 0.09       | 0.07       | 0.08       | 0.08       | 0.07       | 0.06       | 0.05       |  |

## List of figures

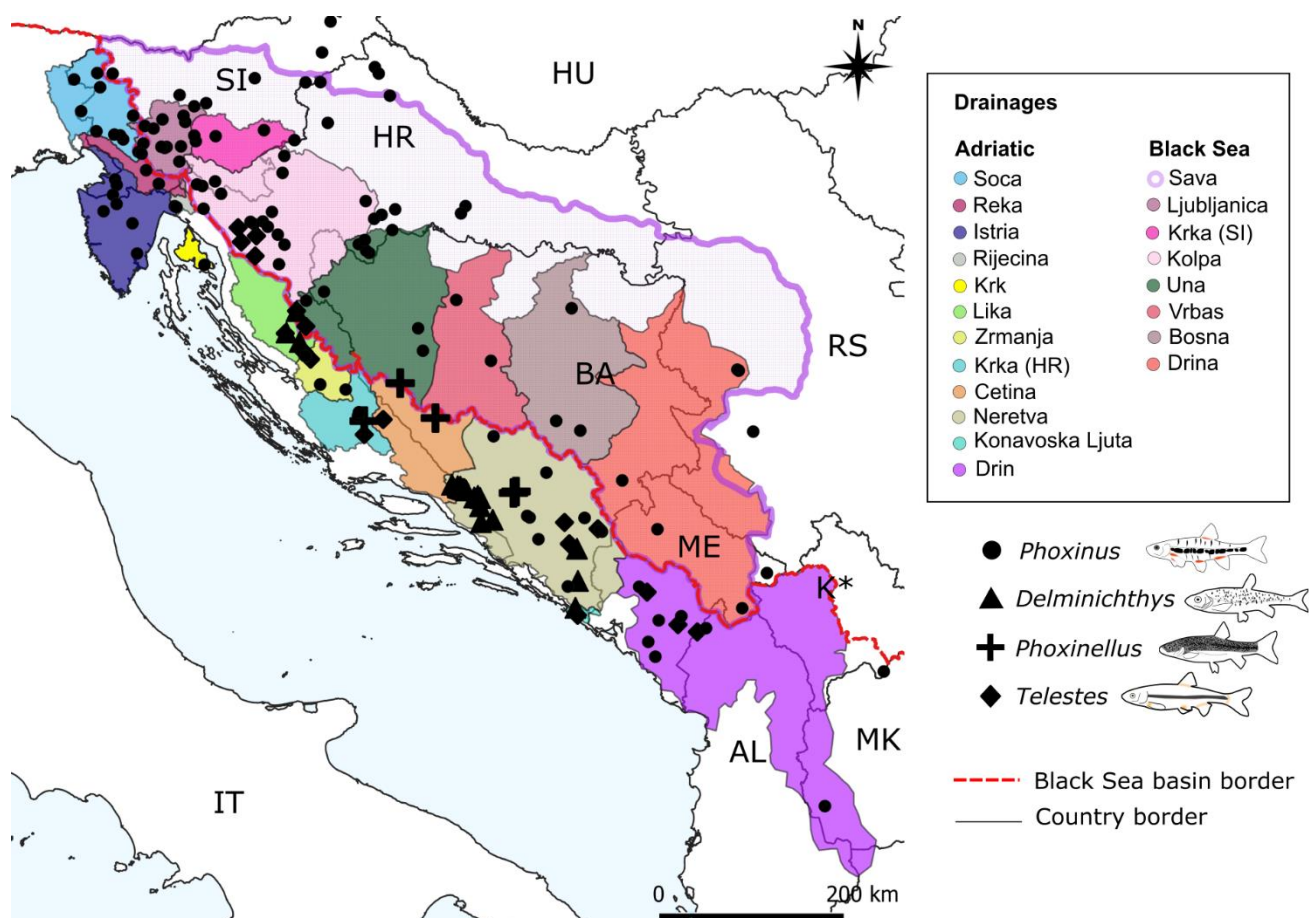

**Figure S1.** Major river drainages in the Dinaric karst with the distribution of the four fish genera *Phoxinus*, *Delminichthys*, *Phoxinellus* and *Telestes*. Each Symbols correspond to species (see legend).

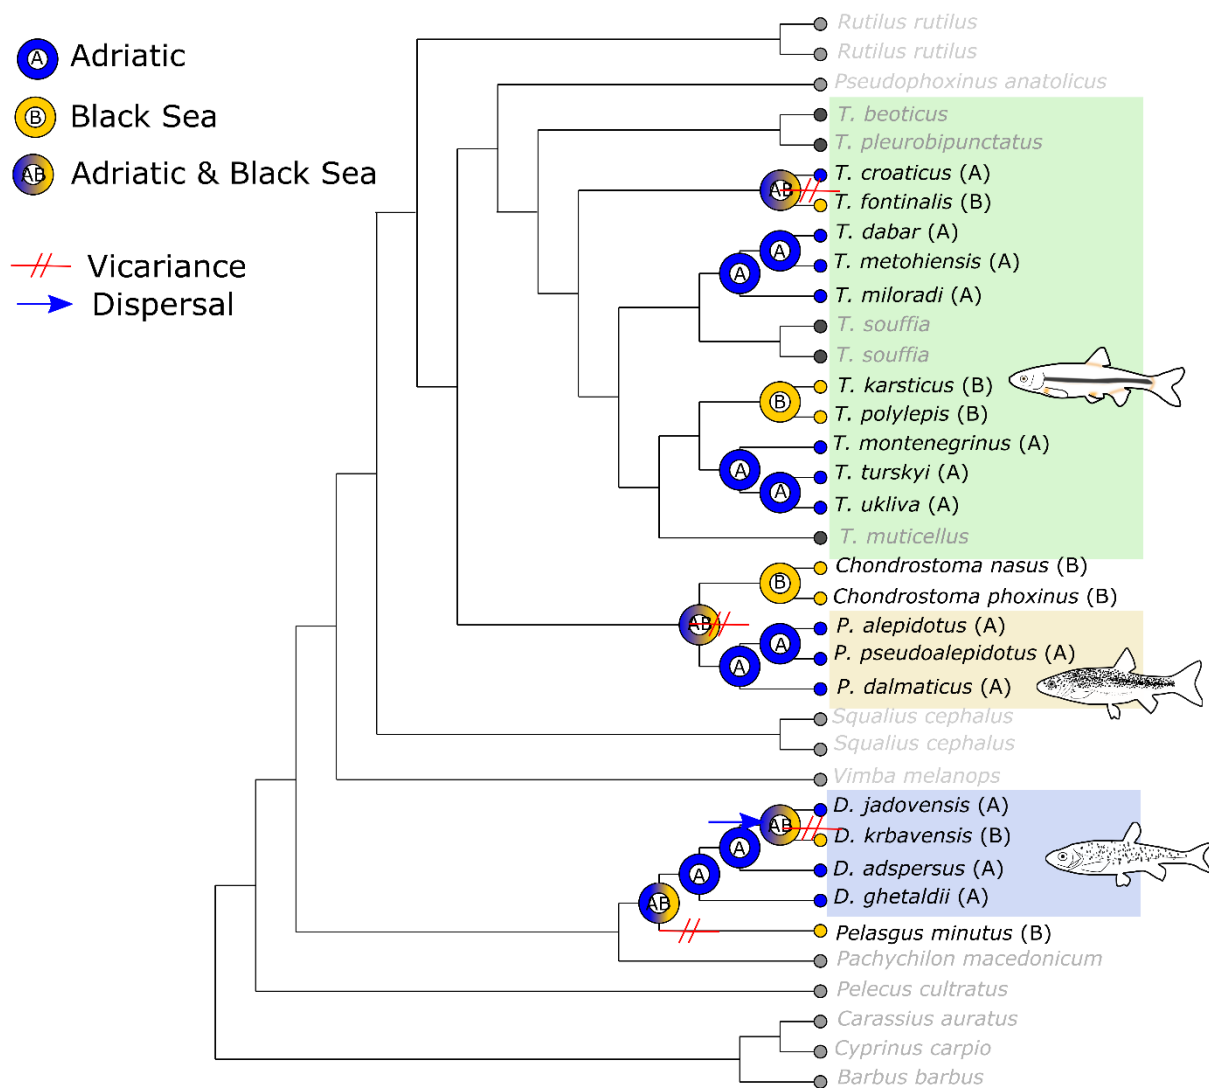

**Figure S2.** Reconstruction of ancestral areas (RASP) analyses of *Delminichthys*, *Phoxinellus* and *Telestes* (together with sister genera and outgroups, for details see Table S4) using two biogeographic areas: Adriatic and Black Sea basin (see legend) and based on cytochrome b fragment. The analysis was performed with S-DIVA [20] and implemented in RASP [21] based on the phylogenetic trees calculated in the divergence timing analysis (BEAST [1] see Materials and Methods for details). Pie chart at node represent the most likely ancestral distributions and letters denote which regions (Adriatic, Black Sea, or both) are coded by each color. Letters following tip labels indicate the recent distribution of each tip. Only ancestral areas with a probability >0.5 are shown. Vicariance and/or dispersal events are given next to the pie chart.



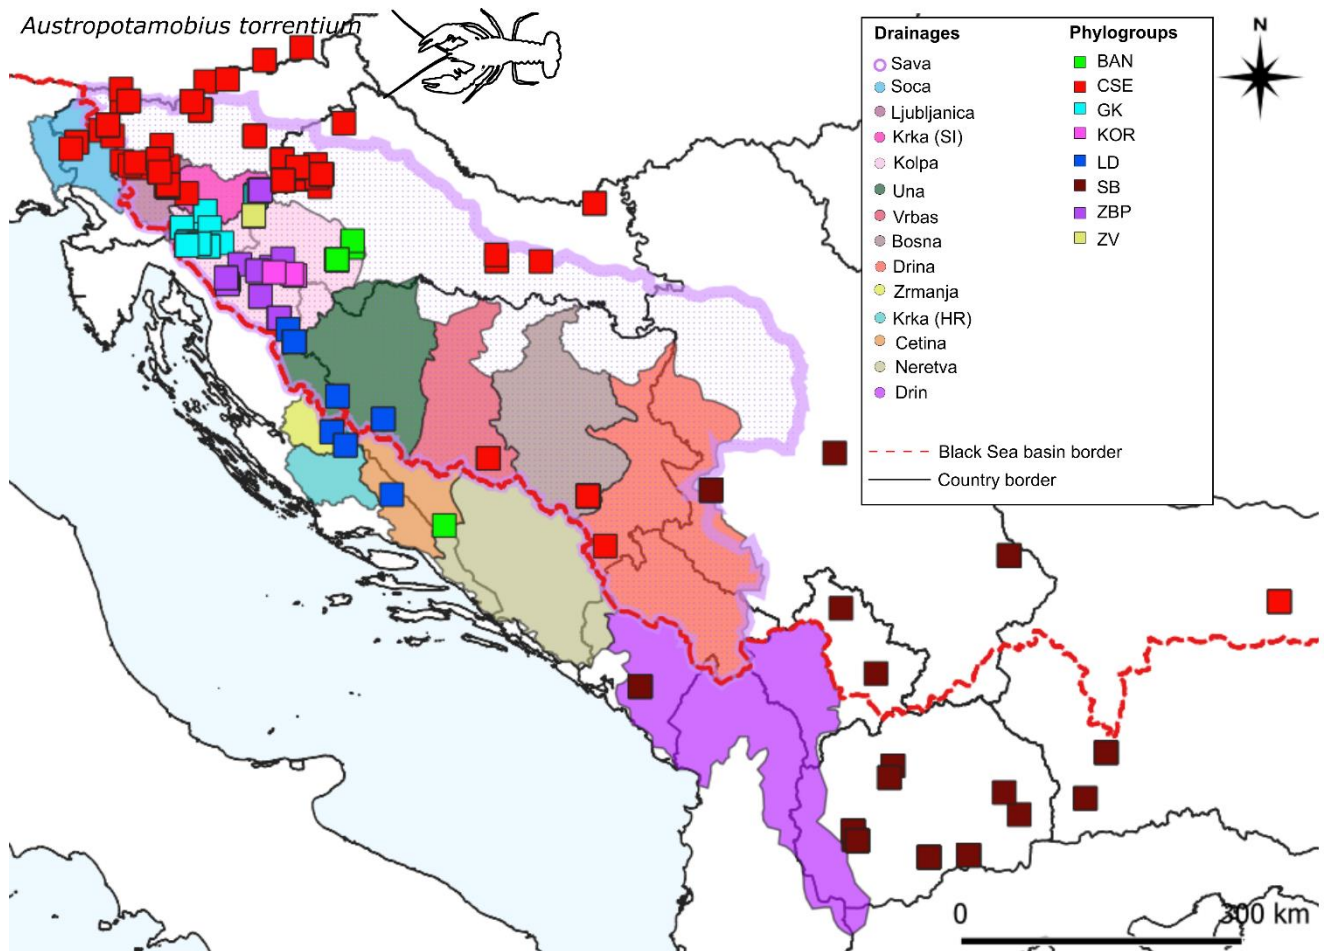

**Figure S3.** Distribution map of the mitochondrial lineages of stone crayfish *Austropotamobius torrentium* summarized according to [22, 23, 24]; based on cytochrome oxidase I. The lineages are coded in Klobucar et al. [22] and were thereafter used with these names throughout the literature. CSE – central and south-eastern Europe, SB – southern Balkans, GK – Gorski Kotar, BAN - Banovina, ZV – Zeleni vir, KOR - Kolpa, LD – Lika and Dalmacija, ZBP – Zumberak, Plitvice and Bjelolasica. The red dashed line represents the Adriatic-Black Sea basin divide.

## References

1. Drummond, A.J.; Rambaut, A. BEAST: Bayesian Evolutionary Analysis by Sampling Trees. *BMC Evolutionary Biology* **2007**, *7*, 214, doi:10.1186/1471-2148-7-214.
2. Saitoh, K.; Sado, T.; Doosey, M.H.; BART Jr, H.L.; Inoue, J.G.; Nishida, M.; Mayden, R.L.; Miya, M. Evidence from Mitochondrial Genomics Supports the Lower Mesozoic of South Asia as the Time and Place of Basal Divergence of Cypriniform Fishes (Actinopterygii: Ostariophysi): CYPRINIFORM MITOGENOMICS AND BIOGEOGRAPHY. *Zoological Journal of the Linnean Society* **2011**, *161*, 633–662, doi:10.1111/j.1096-3642.2010.00651.x.

3. Chang, Y.; Huang, F.; Lo, T. The Complete Nucleotide Sequence and Gene Organization of Carp (*Cyprinus carpio*) Mitochondrial Genome. *J Mol Evol* **1994**, *38*, 138–155, doi:10.1007/BF00166161.
4. Palandačić, A.; Bravničar, J.; Zupančič, P.; Šanda, R.; Snoj, A. Molecular Data Suggest a Multispecies Complex of *Phoxinus* (Cyprinidae) in the Western Balkan Peninsula. *Molecular Phylogenetics and Evolution* **2015**, *92*, 118–123, doi:10.1016/j.ympev.2015.05.024.
5. Reier, S.; Kruckenhauser, L.; Snoj, A.; Trontelj, P.; Palandačić, A. The Minnow *Phoxinus phoxinus* (Leuciscidae) Shifts the Adriatic/Black Sea Basin Divide in the North-Western Dinaric Karst. **submitted**.
6. Vučić, M.; Jelić, D.; Žutinić, P.; Grandjean, F.; Jelić, M. Distribution of Eurasian Minnows (*Phoxinus*: Cypriniformes) in the Western Balkans. *Knowl. Manag. Aquat. Ecosyst.* **2018**, *11*, doi:10.1051/kmae/2017051.
7. Iwasaki, W.; Fukunaga, T.; Isagozawa, R.; Yamada, K.; Maeda, Y.; Satoh, T.P.; Sado, T.; Mabuchi, K.; Takeshima, H.; Miya, M.; et al. MitoFish and MitoAnnotator: A Mitochondrial Genome Database of Fish with an Accurate and Automatic Annotation Pipeline. *Molecular Biology and Evolution* **2013**, *30*, 2531–2540, doi:10.1093/molbev/mst141.
8. Saitoh, K.; Sado, T.; Mayden, R.L.; Hanzawa, N.; Nakamura, K.; Nishida, M.; Miya, M. Mitogenomic Evolution and Interrelationships of the Cypriniformes (Actinopterygii: Ostariophysi): The First Evidence Toward Resolution of Higher-Level Relationships of the World's Largest Freshwater Fish Clade Based on 59 Whole Mitogenome Sequences. *J Mol Evol* **2006**, *63*, 826–841, doi:10.1007/s00239-005-0293-y.
9. Cheng, L.; Liang, L.-Q.; Sun, X.-W. The Complete Mitochondrial Genome of the Crucian Carp, *Carassius carassius* (Cypriniformes, Cyprinidae). *Mitochondrial DNA* **2012**, *23*, 350–351, doi:10.3109/19401736.2012.690753.
10. Schönhuth, S.; Vukić, J.; Šanda, R.; Yang, L.; Mayden, R.L. Phylogenetic Relationships and Classification of the Holarctic Family Leuciscidae (Cypriniformes: Cyprinoidei). *Molecular Phylogenetics and Evolution* **2018**, *127*, 781–799, doi:10.1016/j.ympev.2018.06.026.
11. Palandačić, A.; Matschiner, M.; Zupančič, P.; Snoj, A. Fish Migrate Underground: The Example of *Delminichthys adspersus* (Cyprinidae). *Molecular Ecology* **2012**, *21*, 1658–1671, doi:10.1111/j.1365-294X.2012.05507.x.
12. Viñuela Rodríguez, N.; Šanda, R.; Zogaris, S.; Vukić, J. Evolutionary History of the *Pelasgus* Minnows (Teleostei: Leuciscidae), an Ancient Endemic Genus from the Balkan Peninsula. *Molecular Phylogenetics and Evolution* **2021**, *164*, 107274, doi:10.1016/j.ympev.2021.107274.
13. Freyhof, J.; Lieckfeldt, D.; Bogutskaya, N.G.; Pitra, C.; Ludwig, A. Phylogenetic Position of the Dalmatian Genus *Phoxinellus* and Description of the Newly Proposed Genus *Delminichthys* (Teleostei: Cyprinidae). *Molecular Phylogenetics and Evolution* **2006**, *38*, 416–425, doi:10.1016/j.ympev.2005.07.024.
14. Hrbek, T.; Stölting, K.N.; Bardakci, F.; Küçük, F.; Wildekamp, R.H.; Meyer, A. Plate Tectonics and Biogeographical Patterns of the *Pseudophoxinus* (Pisces: Cypriniformes) Species Complex of Central Anatolia, Turkey. *Molecular Phylogenetics and Evolution* **2004**, *32*, 297–308, doi:10.1016/j.ympev.2003.12.017.
15. Buj, I.; Marčić, Z.; Čaleta, M.; Šanda, R.; Geiger, M.F.; Freyhof, J.; Machordom, A.; Vukić, J. Ancient Connections among the European Rivers and Watersheds Revealed from the Evolutionary History of the Genus *Telestes* (Actinopterygii: Cypriniformes). *PLOS ONE* **2017**, *12*, e0187366, doi:10.1371/journal.pone.0187366.
16. Ketmaier, V.; Bianco, P.G.; Cobolli, M.; Krivokapic, M.; Caniglia, R.; De Matthaëis, E. Molecular Phylogeny of Two Lineages of Leuciscinae Cyprinids (*Telestes* and *Scardinius*) from the Peri-Mediterranean Area Based on Cytochrome b Data. *Molecular Phylogenetics and Evolution* **2004**, *32*, 1061–1071, doi:10.1016/j.ympev.2004.04.008.
17. Marčić, Z.; Buj, I.; Duplić, A.; Čaleta, M.; Mustafić, P.; Zanella, D.; Zupančič, P.; Mrakovčić, M. A New Endemic Cyprinid Species from the Danube Drainage. *Journal of Fish Biology* **2011**, no-no, doi:10.1111/j.1095-8649.2011.03038.x.

18. Benovics, M.; Desdevises, Y.; Šanda, R.; Vukić, J.; Šimková, A. Cophylogenetic Relationships between *Dactylogyrus* (Monogenea) Ectoparasites and Endemic Cyprinoids of the North-Eastern European Peri-Mediterranean Region. *Journal of Zoological Systematics and Evolutionary Research* **2020**, *58*, 1–21, doi:10.1111/jzs.12341.
19. Perea, S.; Böhme, M.; Zupančič, P.; Freyhof, J.; Šanda, R.; Özuluğ, M.; Abdoli, A.; Doadrio, I. Phylogenetic Relationships and Biogeographical Patterns in Circum-Mediterranean Subfamily Leuciscinae (Teleostei, Cyprinidae) Inferred from Both Mitochondrial and Nuclear Data. *BMC Evolutionary Biology* **2010**, *10*, 265, doi:10.1186/1471-2148-10-265.
20. Yu, Y.; Harris, A.J.; He, X. S-DIVA (Statistical Dispersal-Vicariance Analysis): A Tool for Inferring Biogeographic Histories. *Mol Phylogenet Evol* **2010**, *56*, 848–850, doi:10.1016/j.ympev.2010.04.011.
21. Yu, Y.; Harris, A.J.; Blair, C.; He, X. RASP (Reconstruct Ancestral State in Phylogenies): A Tool for Historical Biogeography. *Molecular Phylogenetics and Evolution* **2015**, *87*, 46–49, doi:10.1016/j.ympev.2015.03.008.
22. Klobučar, G.I.V.; Podnar, M.; Jelić, M.; Franjević, D.; Faller, M.; Štambuk, A.; Gottstein, S.; Simić, V.; Maguire, I. Role of the Dinaric Karst (Western Balkans) in Shaping the Phylogeographic Structure of the Threatened Crayfish *Austropotamobius torrentium*. *Freshwater Biology* **2013**, *58*, 1089–1105, doi:10.1111/fwb.12110.
23. Pârvulescu, L.; Pérez-Moreno, J.L.; Panaiotu, C.; Drăguț, L.; Schrimpf, A.; Popovici, I.; Zaharia, C.; Weiperth, A.; Gál, B.; Schubart, C.D.; et al. A Journey on Plate Tectonics Sheds Light on European Crayfish Phylogeography. *Ecol Evol* **2019**, *9*, 1957–1971, doi:10.1002/ece3.4888.
24. Lovrenčić, L.; Bonassin, L.; Boštjančić, L.L.; Podnar, M.; Jelić, M.; Klobučar, G.; Jaklič, M.; Slavevska-Stamenković, V.; Hinić, J.; Maguire, I. New Insights into the Genetic Diversity of the Stone Crayfish: Taxonomic and Conservation Implications. *BMC Evol Biol* **2020**, *20*, 146, doi:10.1186/s12862-020-01709-1.
